# Supplementary material for: Effects of platelet-rich plasma on mesenchymal stem cells isolated from rat uterus
Source: PeerJ. 2020 Nov 30;8:e10415. doi: 10.7717/peerj.10415 (PMC7713597; doi:10.7717/peerj.10415)
Supplement: Supplemental Information 2 — IHC and western blot counting [file peerj-08-10415-s002.xlsx]

## Sheet: Fig.2
	Proliferation index (Ki-67+/all nuclei)
	Mean of Ki-67+/all nuclei on fields of view
	CGM	PRP	OP
	0	65	40.3226
	3.84615	12.9032	16.3636
	5.88235	28.75	21.5054
	0	63.2653	17.2131
	8.82353	100	29.4118
	45.7143	17.6991	25
	52.1739	32.6923	21.3333
	40	35.7143	5.26316
	16	21.7054	18.6813
	8.82353
Mean	18.1264	41.97	21.6771
SD	19.9649	28.4955	9.65156
ANOVA summary
F	3.531
P value	0.0446
P value summary	*
R square	0.2203
Dunnett's multiple comparisons test	Mean Diff,	95,00% CI of diff,	Significant?	Summary	Adjusted P Value	A-?
CGM vs. PRP	-23.84	-46,29 to -1,398	Yes	*	0.0365	B	PRP
CGM vs. OP	-3.551	-26,00 to 18,89	No	ns	0.9064	C	OP
	Relative protein level of p53
	CGM	PRP	OP
	230	438.8	770
	433.6	416.6	1087.3
	531.5	760.9	1962.7
Mean	398.367	538.767	1273.33
SD	153.807	192.693	617.729
Kruskal-Wallis test
P value	0.05
Exact or approximate P value?	Exact
P value summary	*
Number of groups	3
Kruskal-Wallis statistic	5.6
Uncorrected Dunn's test	Mean rank diff,	Significant?	Summary	Individual P Value	A-?
CGM vs. PRP	-1	No	ns	0.6547	B	PRP
CGM vs. OP	-5	Yes	*	0.0253	C	OP
	Relative protein level of Bcl-2
	CGM	PRP	OP
	418	231	459
	96.4	19.5	30.9
	266	33.4	36
Mean	260.133	94.6333	175.3
SD	160.88	118.301	245.705
ANOVA summary
F	0.6149
P value	0.5716
P value summary	ns
R square	0.1701
	Relative protein level of LC3B
	CGM	PRP	OP
	1.2	3.9	3.9
	0.1	3.7	3.6
	2.9	9.6	7.4
	2.9	18.8	6.6
Mean	1.775	9	5.375
SD	1.37447	7.08284	1.90853
Kruskal-Wallis test
P value	0.0071
Exact or approximate P value?	Exact
P value summary	**
Do the medians vary signif. (P < 0.05)?	Yes
Number of groups	3
Kruskal-Wallis statistic	7.679
Dunn's multiple comparisons test	Mean rank diff,	Significant?	Summary	Adjusted P Value
CGM vs. PRP	-6.625	Yes	*	0.0182
CGM vs. OP	-5.375	No	ns	0.0687

## Sheet: Fig.3
		Relative protein level of MMP9
		CGM	PRP	OP
		55.2	218.6	395.3
		82	187.4	334.3
		126.5	197.6	665.4
		236.6	1016.3	904.2
	Mean	125.075	404.975	574.8
	SD	79.9538	407.757	262.535
Kruskal-Wallis test
P value	0.0365
Exact or approximate P value?	Exact
P value summary	*
Do the medians vary signif. (P < 0.05)?	Yes
Number of groups	3
Kruskal-Wallis statistic	6.038
Dunn's multiple comparisons test	Mean rank diff,	Significant?	Summary	Adjusted P Value
CGM vs. PRP	-3.5	No	ns	0.3396
CGM vs. OP	-6.25	Yes	*	0.0285
	Relative protein level of ERα
	CGM	PRP	OP
	0.024316	21.0812	23.3152
	0.012782	2.86342	10.0375
	4.24111	21.2585	0.011522
Mean	1.42607	15.0677	11.1214
SD	2.43791	10.5696	11.6896
Kruskal-Wallis test
P value	0.4393
Exact or approximate P value?	Exact
P value summary	ns
Number of groups	3
Kruskal-Wallis statistic	1.867
