# Supplementary material for: Effects of platelet-rich plasma on mesenchymal stem cells isolated from rat uterus
Source: PeerJ journal article supplement (doi:10.7717/peerj.10415), 2020-11-30
Supplement: Supplementary_information.pdf [file Supplementary_information.pdf]

# Supplementary information

## Effects of platelet-rich plasma on mesenchymal stem cells isolated from rat uterus

Vishnyakova Polina, Artemova Daria, Elchaninov Andrey, Efendieva Zulfiia, Apolikhina Inna, Sukhikh Gennady and Fatkhudinov Timur

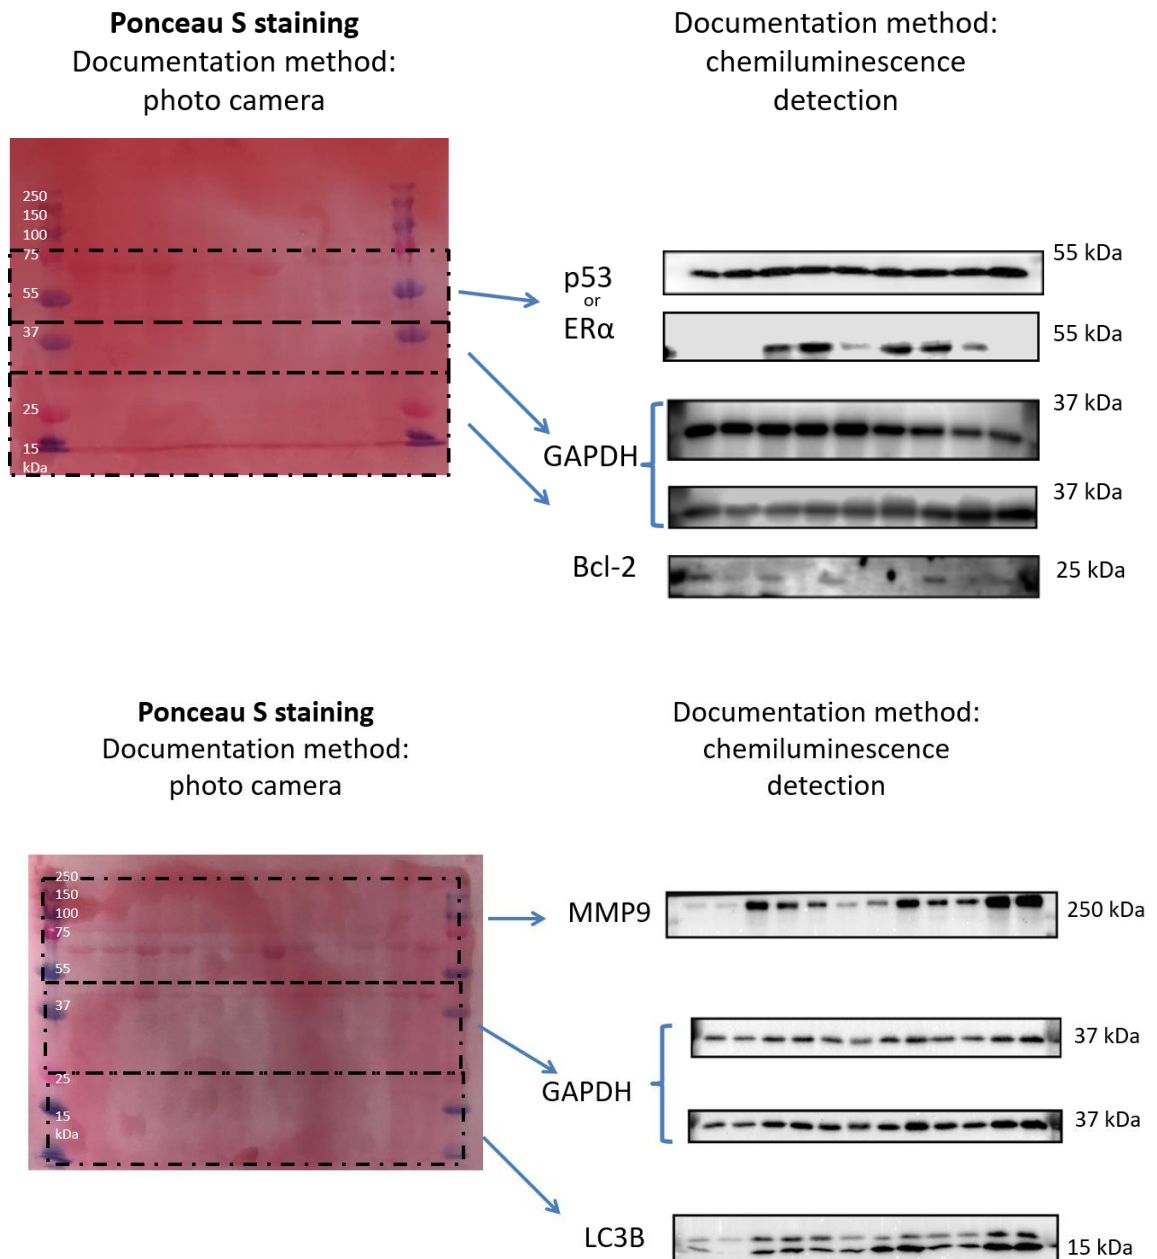

Fig.S1. Full-size membrane after blotting of polyacrylamide gel. Schemes of membrane Ponceau S staining. After visualization of the proteins with Ponceau S membranes were cut as indicated with a dotted line and stained with mentioned antibodies.
