# Supplementary material for: Effects of platelet-rich plasma on mesenchymal stem cells isolated from rat uterus
Source: PeerJ journal article supplement (doi:10.7717/peerj.10415), 2020-11-30

## Acquisition Information

| # | Image ID   | Acquire Time        | Sensitivity | Image Name | Comment | Image Modifications | Project |
|---|------------|---------------------|-------------|------------|---------|---------------------|---------|
| 1 | 0000014_01 | 19.02.2020 14:49:45 | High        | gapdh      |         |                     |         |

## Image Display Values

| Channel | Color                       | Minimum | Maximum | K   |
|---------|-----------------------------|---------|---------|-----|
| Chemi   | Gray Scale (Black on White) | 2,26    | 331     | 0,5 |

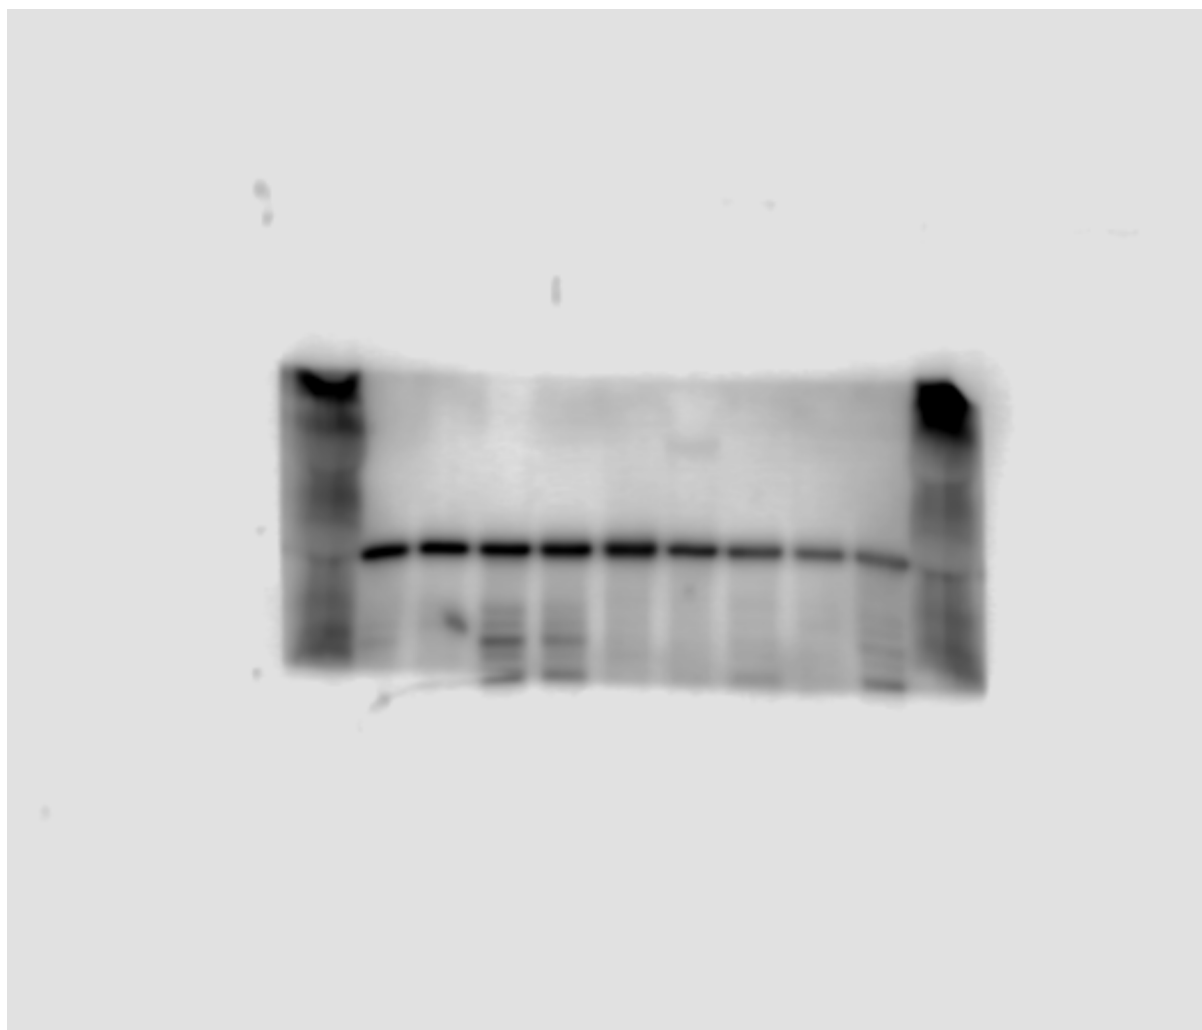

Supplement: WB_membranes.zip [file WB_membranes.zip]
