# Supplementary material for: Effects of platelet-rich plasma on mesenchymal stem cells isolated from rat uterus
Source: PeerJ journal article supplement (doi:10.7717/peerj.10415), 2020-11-30

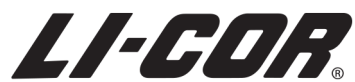

Image ID: 0000018\_01  
Acquire Time: 26.02.2020 15:27:41

Page 1

#### Acquisition Information

| # | Image ID   | Acquire Time        | Sensitivity | Image Name | Comment | Image Modifications | Project |
|---|------------|---------------------|-------------|------------|---------|---------------------|---------|
| 1 | 0000018_01 | 26.02.2020 15:27:41 | High        | gapdh      |         |                     |         |

#### Image Display Values

| Channel | Color                       | Minimum | Maximum | K |
|---------|-----------------------------|---------|---------|---|
| Chemi   | Gray Scale (Black on White) | 2,33    | 121     | 0 |

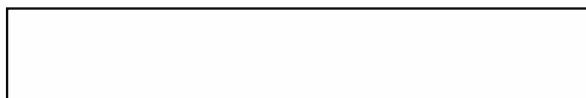

Supplement: WB_membranes.zip [file WB_membranes.zip]
