# Supplementary figures and images for: Effects of platelet-rich plasma on mesenchymal stem cells isolated from rat uterus
Source: PeerJ journal article supplement (doi:10.7717/peerj.10415), 2020-11-30

## Image Report: GAPDH

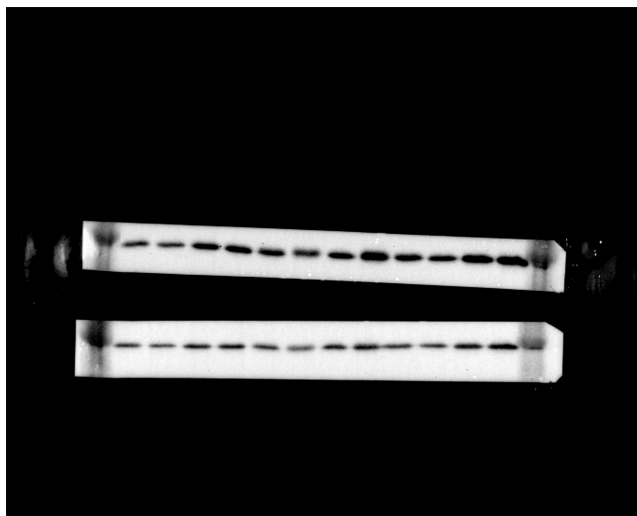

C:\Users\Полина\Desktop\Polina Vishnyakova\ChemiDoc Images  
2020-08-31\_11.51.56\GAPDH.scn

---

Supplement: WB_membranes.zip [file WB_membranes.zip]

## Image Report: MMP9

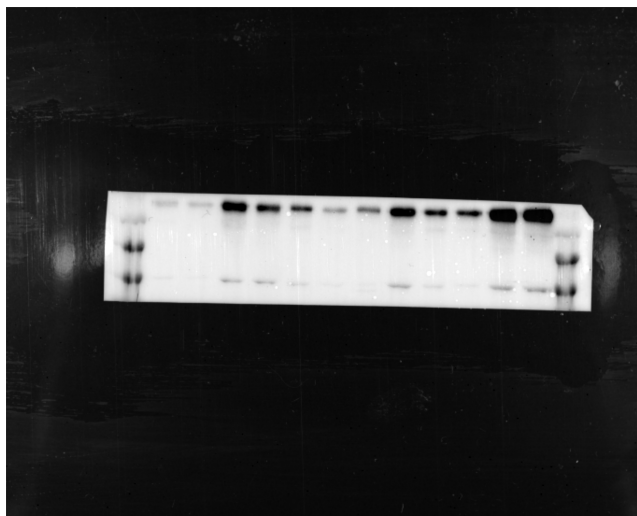

C:\Users\Полина\Desktop\Polina Vishnyakova\ChemiDoc Images 2020-08-31\_11.51.56\MMP9.scn

---

Supplement: WB_membranes.zip [file WB_membranes.zip]

## Image Report: LC3B

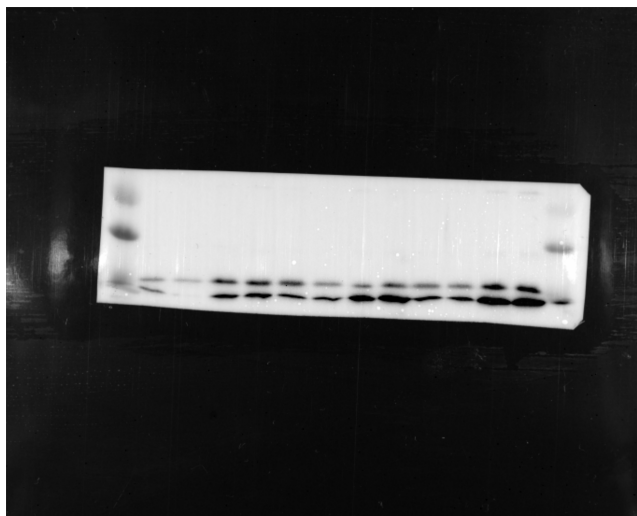

C:\Users\Полина\Desktop\Polina Vishnyakova\ChemiDoc Images 2020-08-31\_11.51.56\LC3B.scn

---

Supplement: WB_membranes.zip [file WB_membranes.zip]
